# Supplementary material
Source: Springer Nature journal article supplement (https://www.springermedizin.de/resource/supplementary/12936_2011_1835_MOESM1_ESM.pdf/9541886)
Supplement: MOESM1 [file 9541886]

# Anopheline vectors

Asia and Oceania

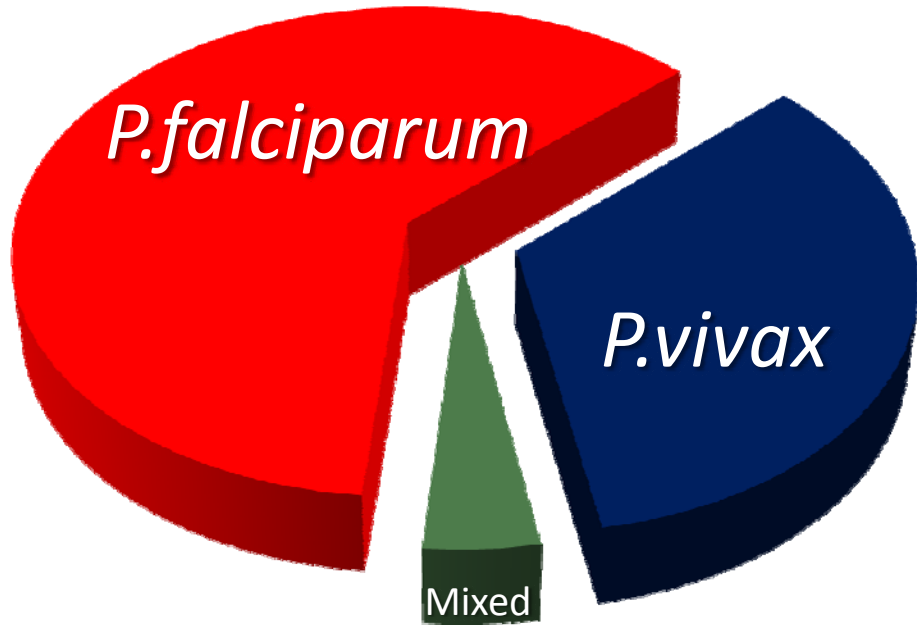

# Patients

Concurrent

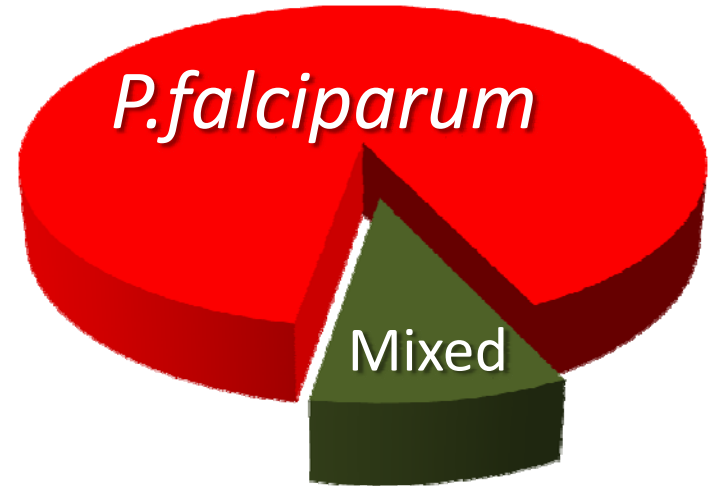

Sequential

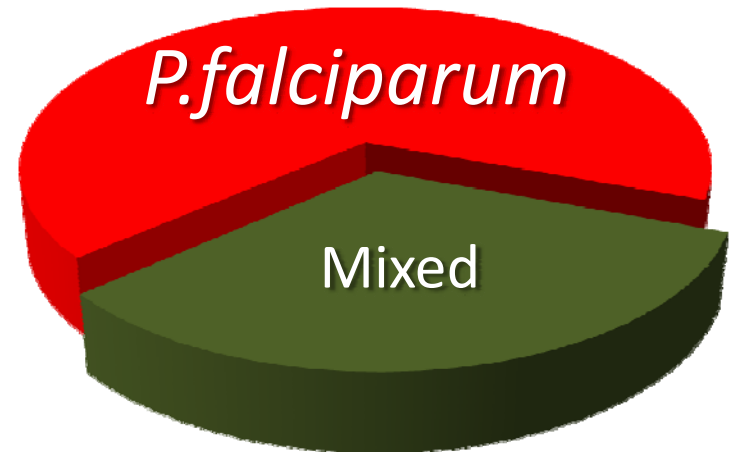

N=36,117 anophelines

0.77% positive

Thailand

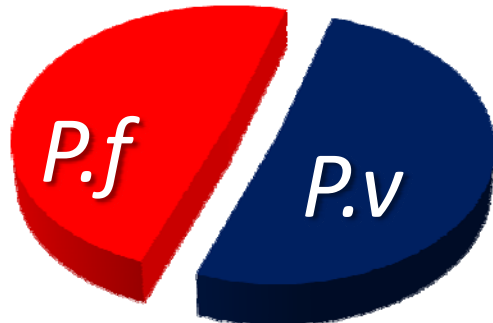

N=11,289 anophelines

0.41% positive
